# Supplementary material for: Role of New Chiral Additives on Physical-Chemical Properties of the Nematic Liquid Crystal Matrix
Source: MDPI journal article supplement (doi:10.3390/ma16176038), 2023-09-02
Supplement: s1 [file materials-2542877-supplementary.pdf › materials-2542877-supplementary.pdf]

# ROLE OF NEW CHIRAL ADDITIVES ON PHYSICAL-CHEMICAL PROPERTIES OF THE NEMATIC LIQUID CRYSTAL MATRIX

Alexey S. Merekalov<sup>1</sup>, Oleg N. Karpov<sup>1</sup>, Georgiy A. Shandryuk<sup>1</sup>, Olga A. Otmakhova<sup>1</sup>, Alexander V. Finko<sup>1,2</sup>, Artem V. Bakirov<sup>3</sup>, Vladimir S. Bezborodov<sup>4</sup> and Raisa V. Talroze<sup>1,\*</sup>

<sup>1</sup> A.V. Topchiev Institute of Petrochemical Synthesis of the Russian Academy of Sciences, Moscow 119991, 29 Leninsky Pr., Russia

<sup>2</sup> Department of Chemistry, Moscow State University, Moscow 119991, Leninskie Gory 1/3, Russia.

<sup>3</sup> N.S. Enikolopov Institute of Synthetic Polymeric Materials, Russian Academy of Sciences, Moscow 117393, 70 Profsoyuznaya Str., Russia

<sup>4</sup> Belarusian State Technological University, 220006, Minsk, 13a Sverdlova Str., Belarus

\*Correspondence address: rtalroze@ips.ac.ru

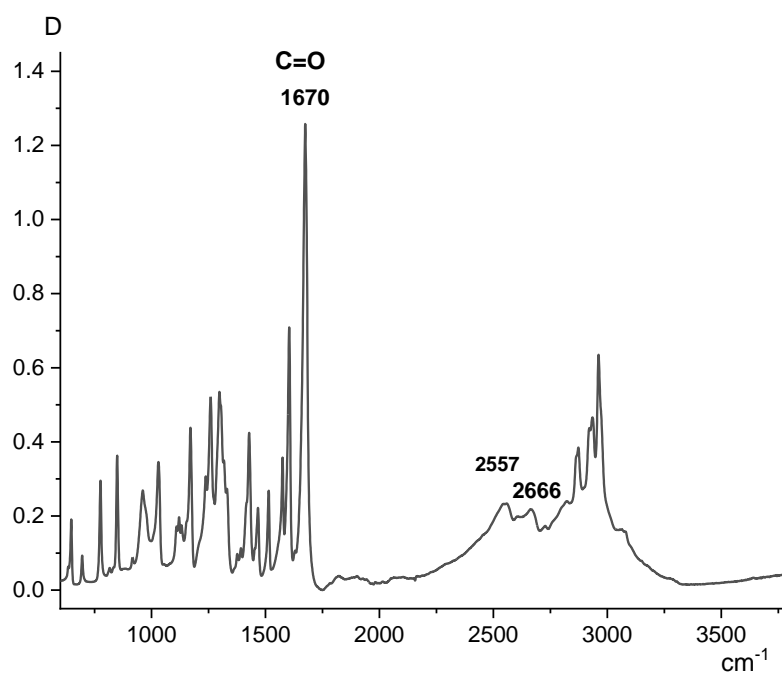

a

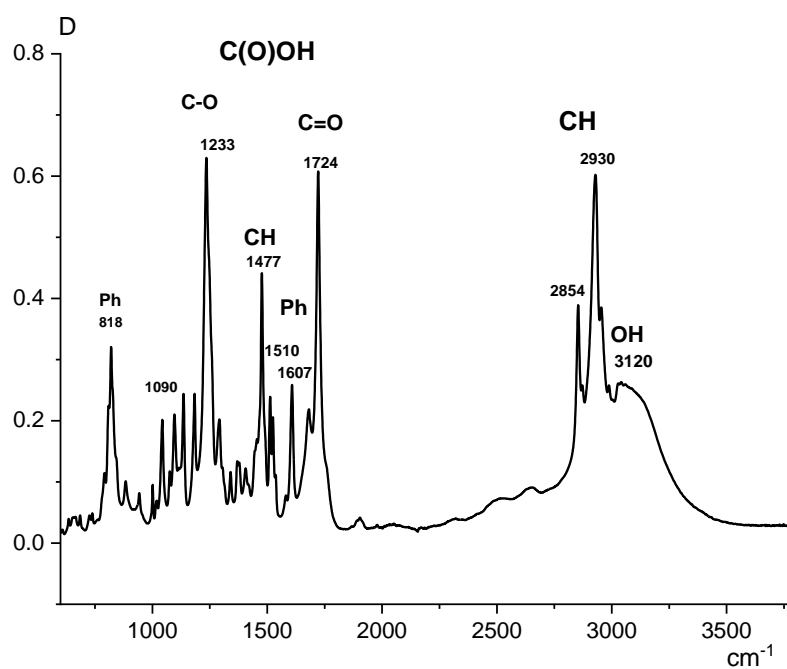

b

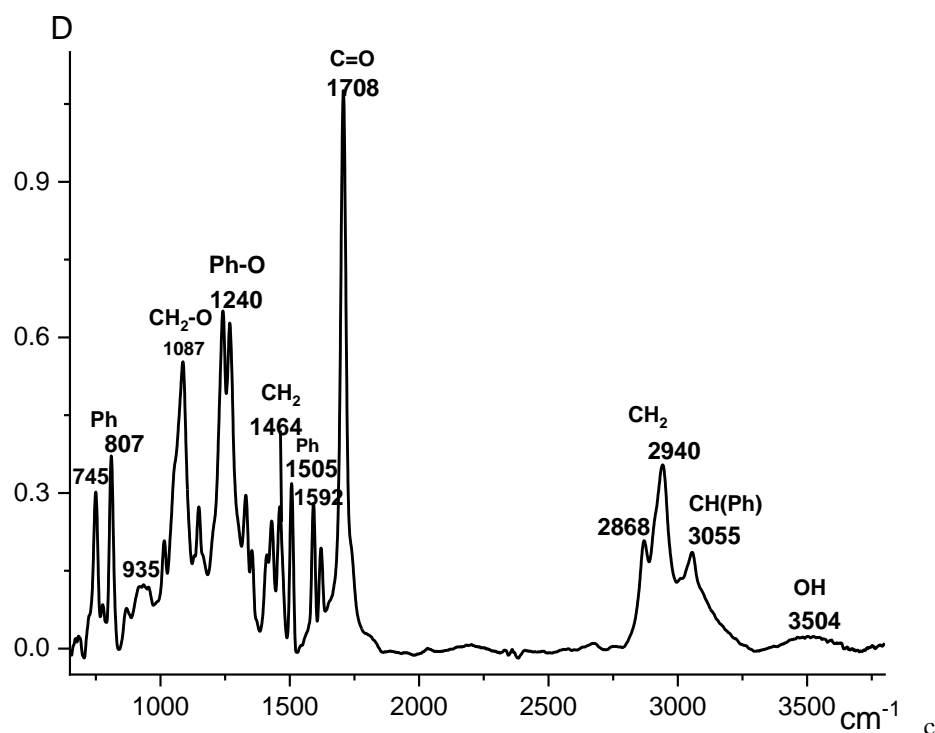

Figure S1. FTIR spectra of CA1 (a), CA2 (b), CA3 (c).

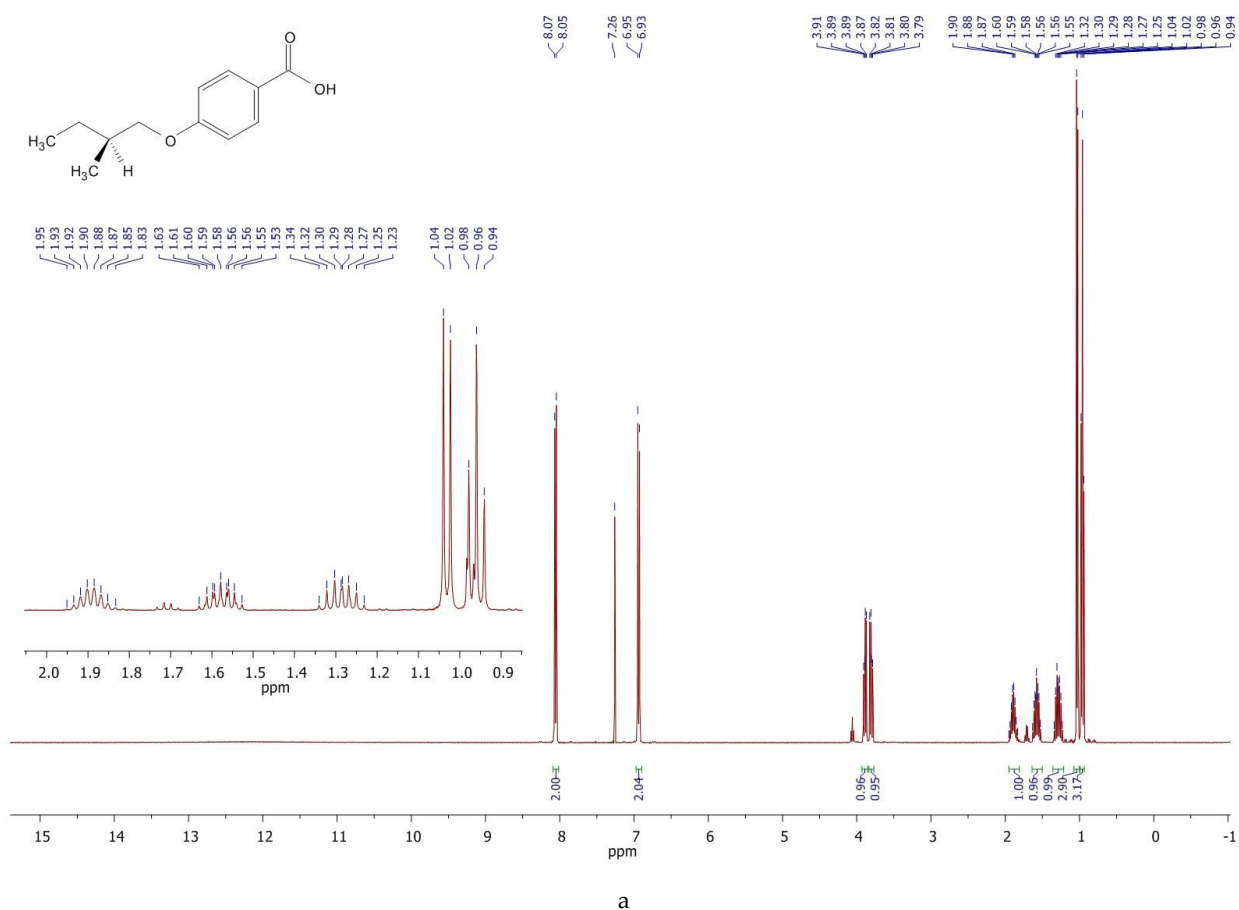

<sup>1</sup>H NMR (400 MHz, CDCl<sub>3</sub>) δ (ppm) 0.96 (t, J = 7.5 Hz, 3H), 1.03 (d, J = 6.8 Hz, 3H), 1.23 – 1.34 (m, 1H), 1.53 – 1.63 (m, 1H), 1.83 – 1.95 (m, 1H), 3.81 (dd, J = 9.0, 6.6 Hz, 1H), 3.89 (dd, J = 9.0, 6.0 Hz, 1H), 6.94 (d, J = 8.9 Hz, 2H), 8.06 (d, J = 8.8 Hz, 2H).

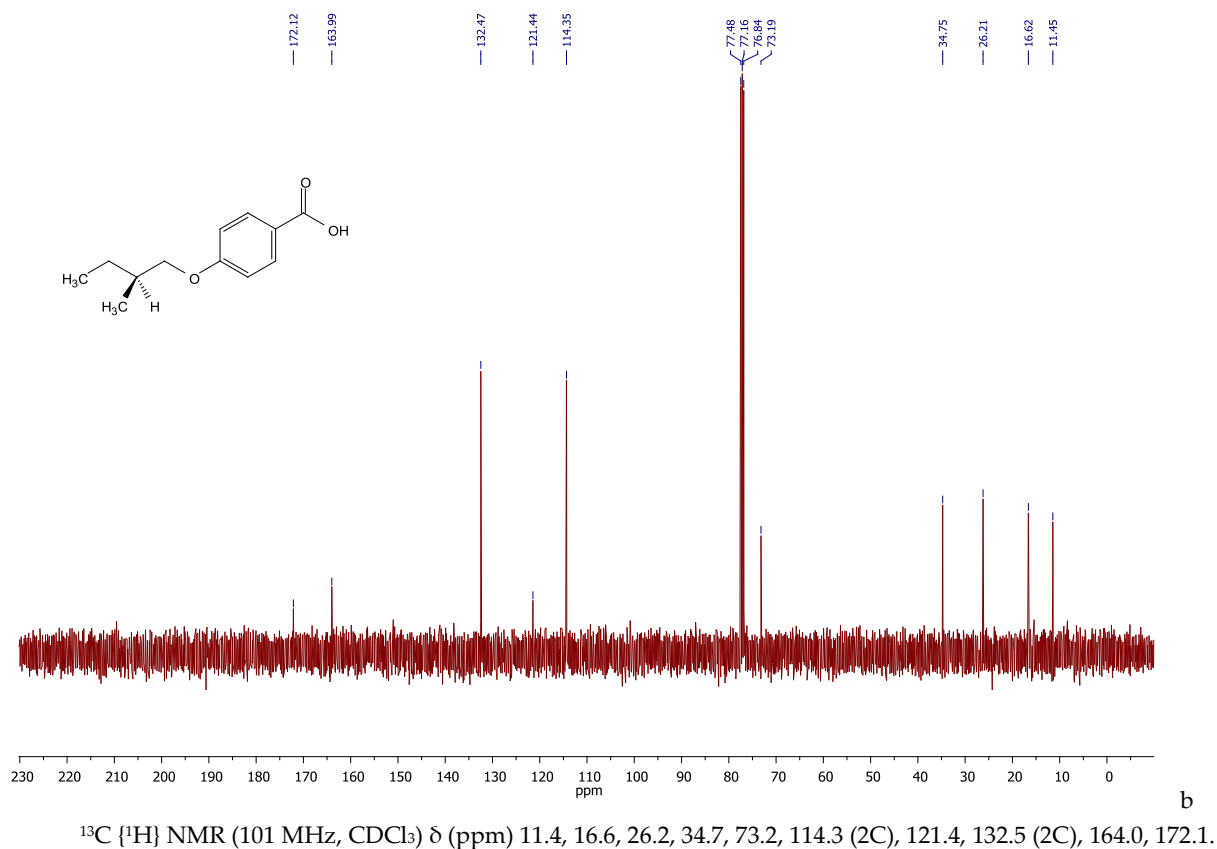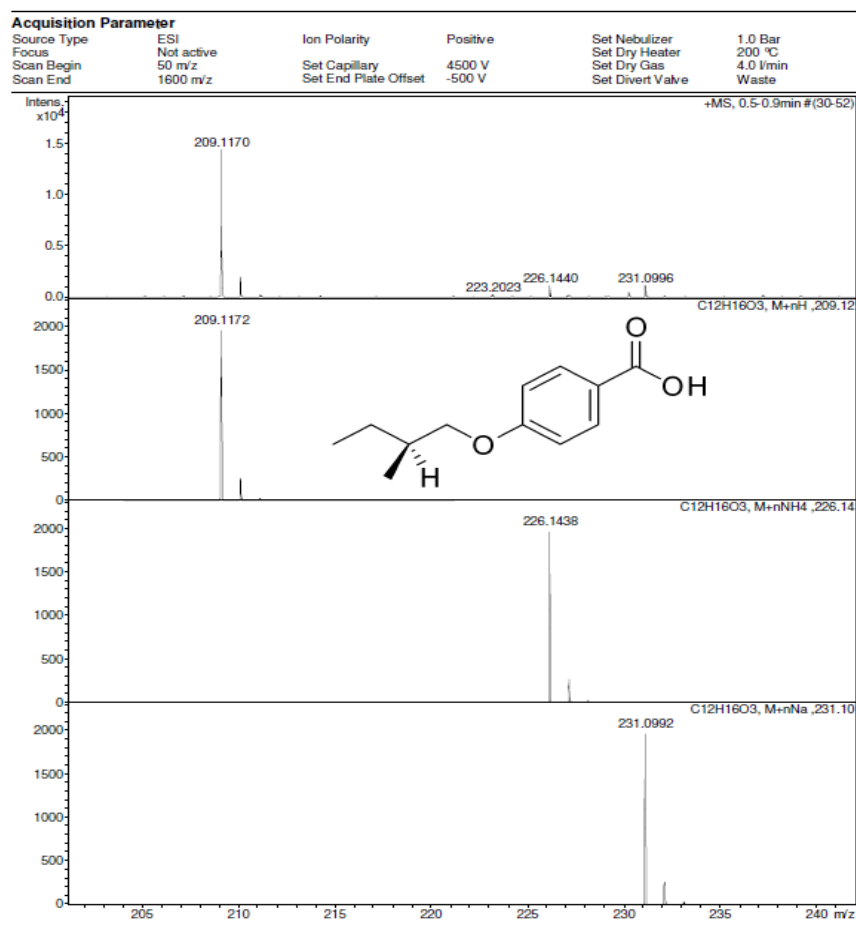

HRMS (FTMS + cESI) m/z: [M+H]<sup>+</sup>, calculated for C<sub>12</sub>H<sub>16</sub>O<sub>3</sub> 209,1172; found 209.1170.

Figure S2. <sup>1</sup>H NMR (a), <sup>13</sup>C NMR (b) and mass-spectra (c) of CA1

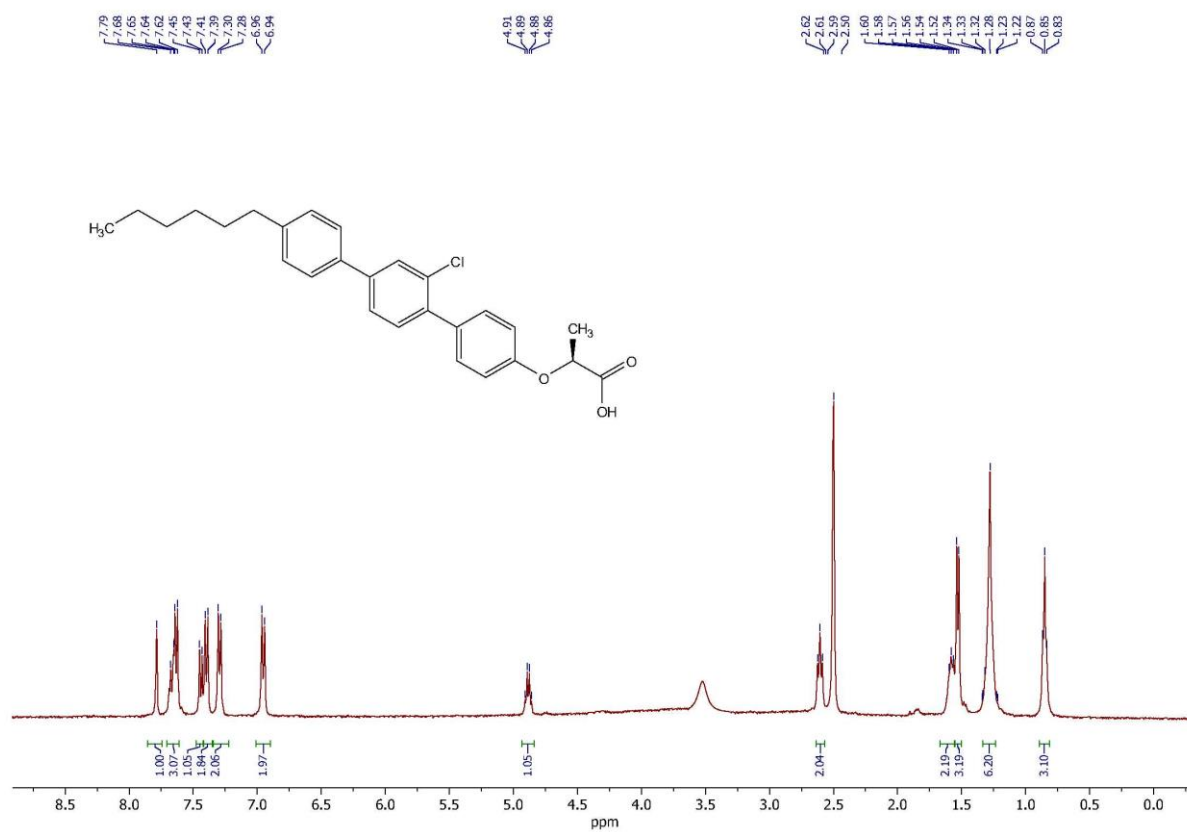

<sup>1</sup>H NMR (400 MHz, DMSO-d<sub>6</sub>) δ (ppm) 0.85 (t, J = 6.3 Hz, 3H, CH<sub>3</sub>), 1.22 – 1.34 (m, 6H, 3×CH<sub>2</sub>), 1.53 (d, J = 6.6 Hz, 3H, Me), 1.56 – 1.60 (m, 2H, CH<sub>2</sub>), 2.61 (t, J = 7.5 Hz, 2H, CH<sub>2</sub>), 4.88 (q, J = 6.6 Hz, 1H, CH), 6.95 (d, J = 8.5 Hz, 2H, H<sub>Ar</sub>), 7.29 (d, J = 7.9 Hz, 2H, H<sub>Ar</sub>), 7.40 (d, J = 8.4 Hz, 2H, H<sub>Ar</sub>), 7.44 (d, J = 8.0 Hz, 1H, H<sub>Ar</sub>), 7.62 – 7.69 (m, 3H, H<sub>Ar</sub>), 7.78 (d, J = 1.4 Hz, 1H, H<sub>Ar</sub>).

Figure S3. <sup>1</sup>H NMR of CA2

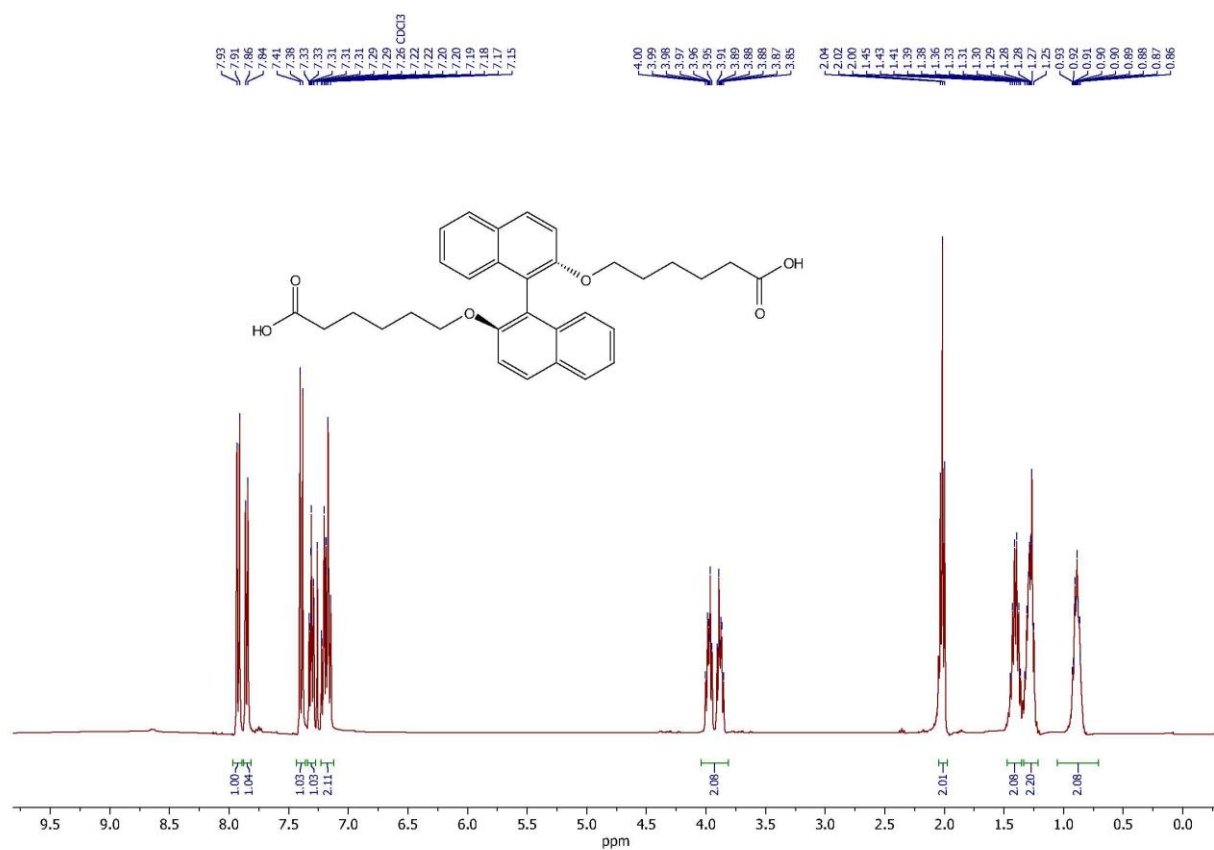

$^1\text{H}$  NMR (400 MHz,  $\text{CDCl}_3$ )  $\delta$  7.92 (d,  $J$  = 9.0 Hz, 1H), 7.85 (d,  $J$  = 8.2 Hz, 1H), 7.39 (d,  $J$  = 9.1 Hz, 1H), 7.31 (ddd,  $J$  = 8.2, 6.5, 1.5 Hz, 1H), 7.15 – 7.22 (m, 2H), 3.85 – 4.00 (m, 2H), 2.02 (t,  $J$  = 7.5 Hz, 2H), 1.36 – 1.45 (m, 2H), 1.25 – 1.33 (m, 2H), 0.86 – 0.93 (m, 2H).

Figure S4.  $^1\text{H}$  NMR spectrum of CA3

Table S1. Elemental Analysis of CA1 (a), CA2 (b), CA3 (c).

|         |                                                                                         |
|---------|-----------------------------------------------------------------------------------------|
| CA1 (a) | Calculated (%): C 69.21; H 7.74; O 23.05; Found (%): C 68.95; H 7.92; O 23.13.          |
| CA2 (b) | Calculated (%): C 74.21; H 6.69; Cl 8.11; O 10.98; Found (%): C 74.35; H 6.76; O 11.10. |
| CA3 (c) | Calculated (%): C, 74.69; H, 6.66; O, 18.65; Found (%): C 74.60; H 6.78; O 18.62.       |

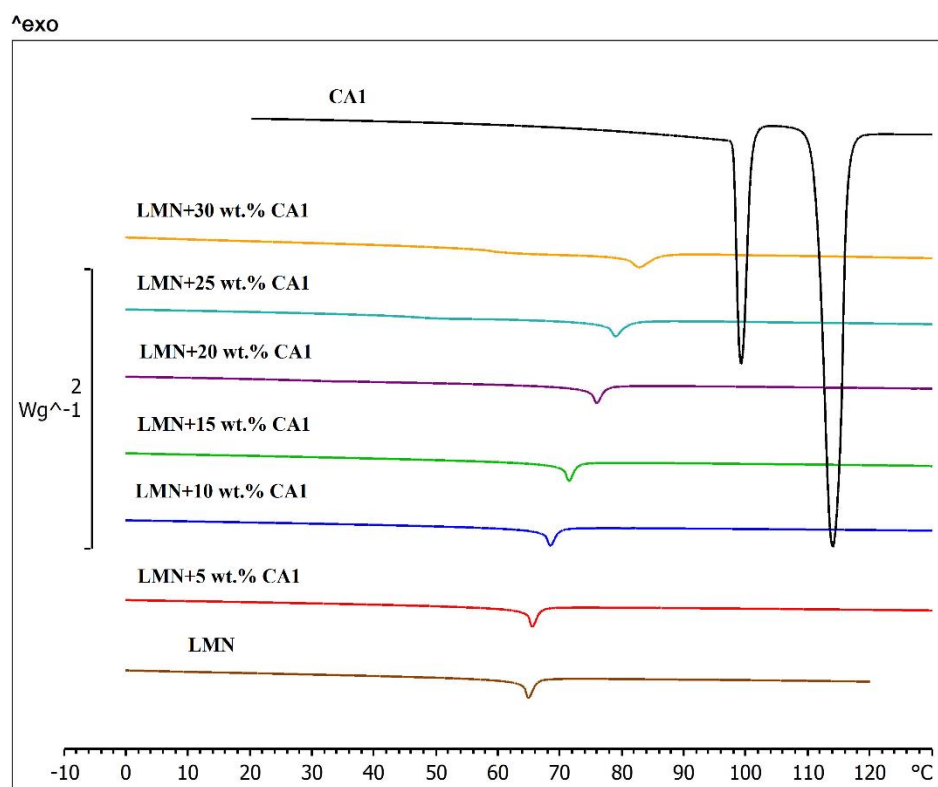

a

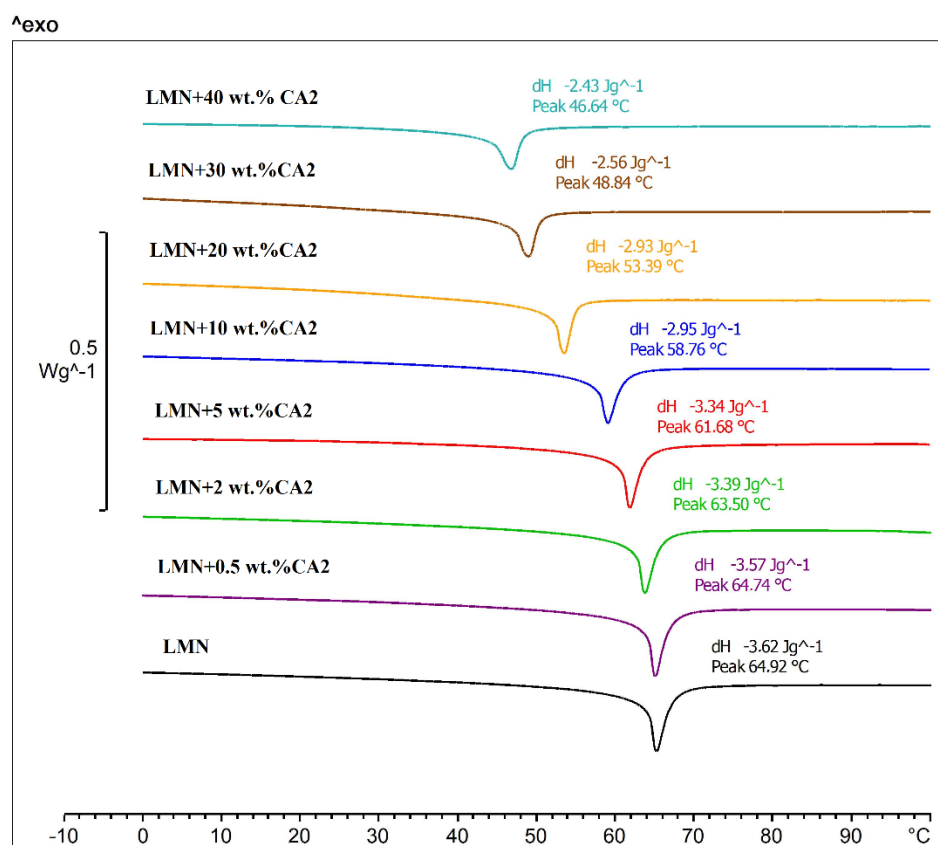

b

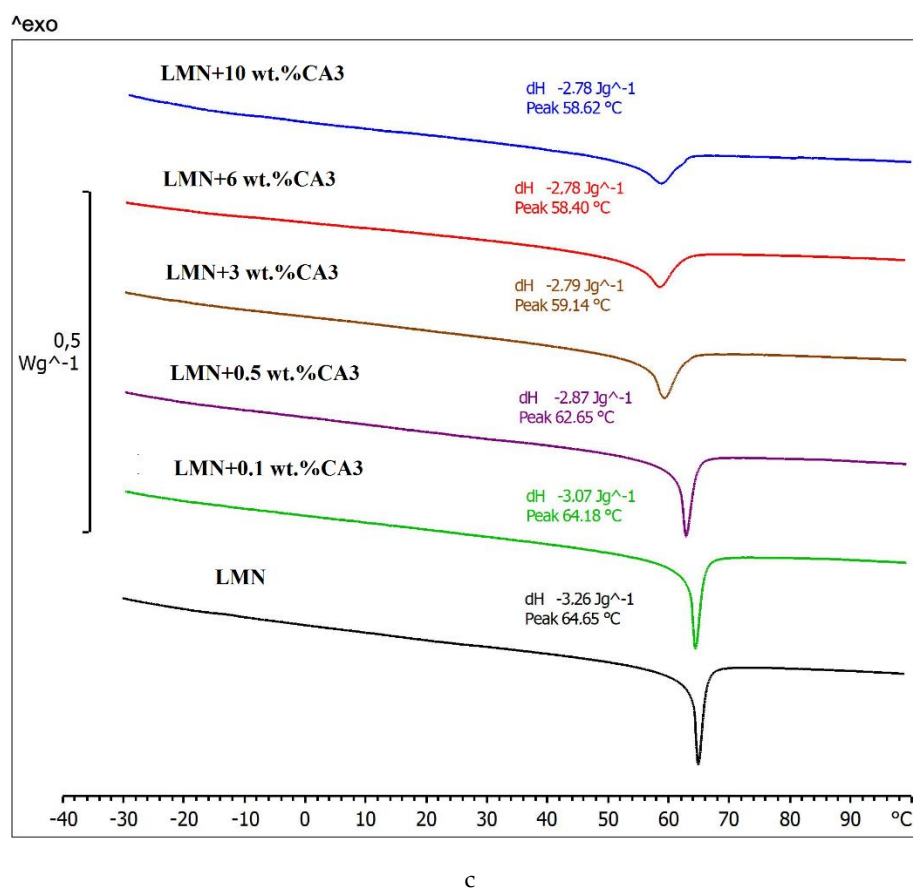

Figure S5. DSC curves of LMN in blends with CA1 (a), CA2(b) and CA3 (c).

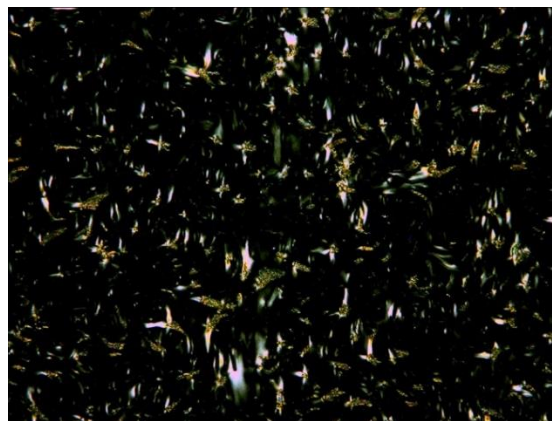

Figure S6 The optical textures (in crossed polarizers) of LMN with 25% CA1 at 22 °C



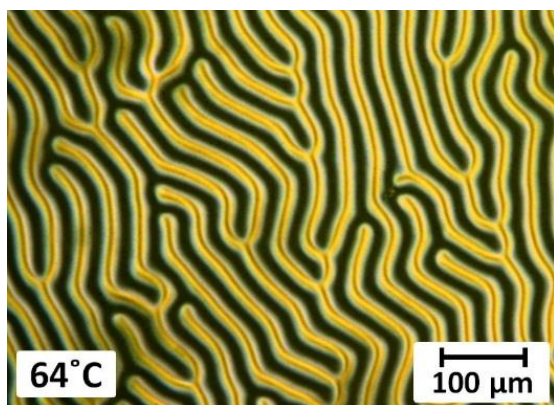

a 15% CA1 heating

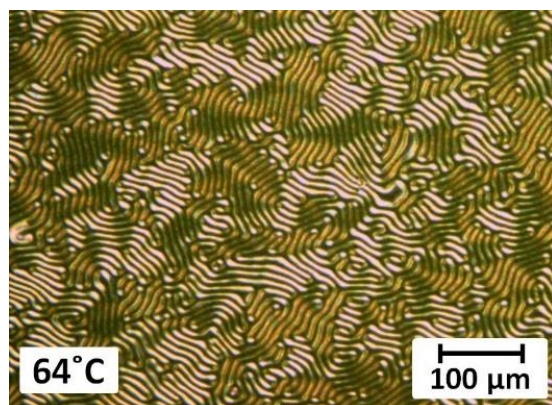

b 15% CA1 cooling

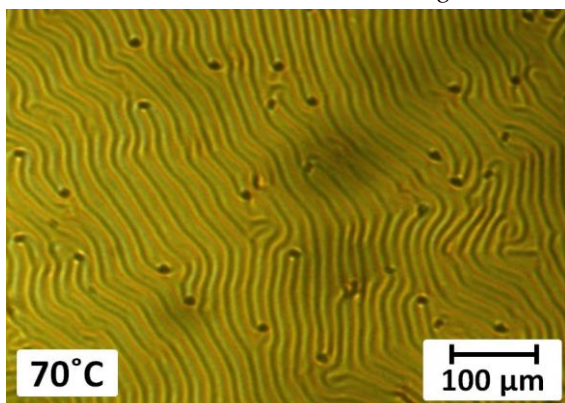

c 20% CA1 heating

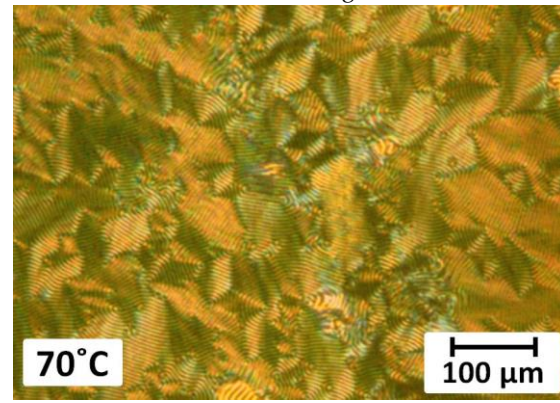

d 20% CA1 cooling

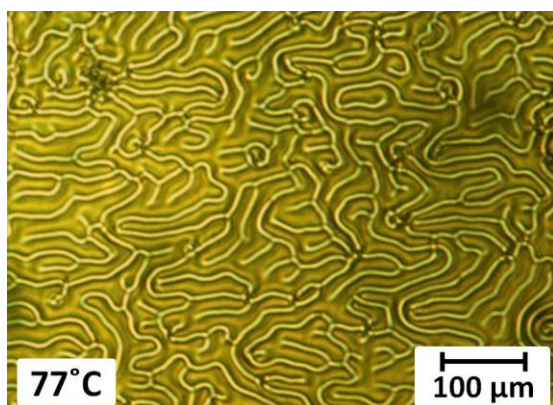

e 25% CA1 heating

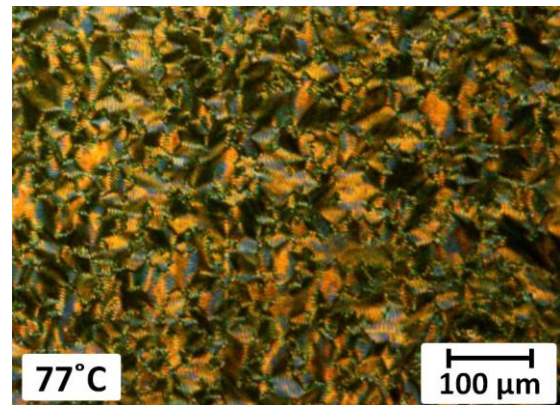

f 25% CA1 cooling

Figure S7 The optical textures (in crossed polarizers) of LMN-CA1 mixtures with different concentration: a,b – 15%, c,d – 20%, e,f – 25%



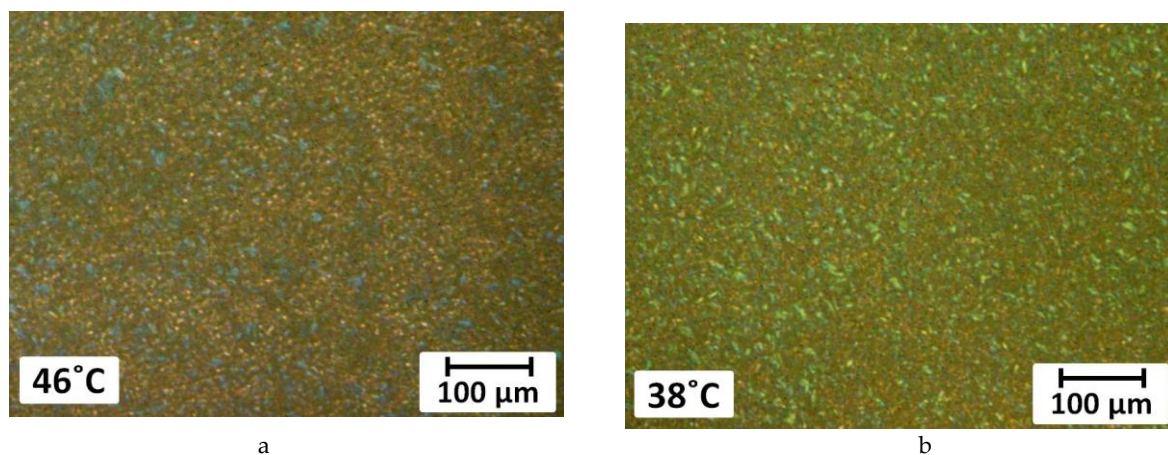

Figure S8. The optical textures (in crossed polarizers) of LMN- 20 wt.% CA2 mixtures: a –heating, b–cooling
